# Supplementary material for: A New Method for Standardizing Inland Fish Community Surveys: Characterizing Habitat Associated with Small-Bodied Fish Species, Abundance, and Size Distributions in a Highly Modified Estuary
Source: Frontiers journal article supplement (doi:10.3389/fenvs.2021.698210), 2021-07-28
Supplement: Table_1.docx [file Table_1.docx]

Supplemental Table 1. Catch per 100 m-3 for all species sampled by habitat type at Mildred Island, California.

|  | Lake | Riverine | Lake Wetland | Riverine Wetland |
| --- | --- | --- | --- | --- |
| American Shad | 0.452 | 0.455 | 3.544 | 0.576 |
| Threadfin Shad | 0.198 | 0.402 | 3.887 | 3.874 |
| Golden Shiner | 0.000 | 0 | 0 | 0.302 |
| White Catfish | 0 | 0 | 0.091 | 0 |
| Brown Bullhead | 0 | 0 | 0.023 | 0 |
| Rainwater Killifish | 0.037 | 0.004 | 21.971 | 9.087 |
| Inland Silverside | 0.015 | 0.017 | 1.692 | 4.695 |
| Striped Bass | 0 | 0.001 | 0 | 0 |
| Bluegill Sunfish | 4.680 | 0.135 | 237.700 | 44.441 |
| Redear Sunfish | 0.053 | 0.041 | 8.002 | 7.056 |
| Warmouth | 0.005 | 0.007 | 0.503 | 1.498 |
| Black Crappie | 0.001 | 0 | 0.091 | 0.043 |
| Largemouth Bass | 0.023 | 0.004 | 1.806 | 0.850 |
| Spotted Bass | 0.012 | 0.002 | 1.075 | 0.806 |
| Shimofuri Gobi | 0 | 0.002 | 0.023 | 0 |
| *Prickly Sculpin | 0 | 0 | 0 | 0.029 |

*Native species
