# Supplementary material for: A New Method for Standardizing Inland Fish Community Surveys: Characterizing Habitat Associated with Small-Bodied Fish Species, Abundance, and Size Distributions in a Highly Modified Estuary
Source: Frontiers journal article supplement (doi:10.3389/fenvs.2021.698210), 2021-07-28
Supplement: Table_2.DOCX [file Table_2.DOCX]

Maternal genotype of tissue samples collected for genetic identification during the 2018 Mildred Island surveys as determined by Sanger sequencing and sequence alignment to NCBI reference database. Reference sequences were downloaded on February 12, 2020 from the NCBI database (https://www.ncbi.nlm.nih.gov/) under the accession numbers listed below.

| **Sample ID** | **Species ID** | **Common Name** | **Percent Identical** | **mtDNA region sequenced** | **NCBI Reference Sequence Accession Number** |
| --- | --- | --- | --- | --- | --- |
| 075 | *Dorosoma petenense* | Threadfin Shad | 100% | Cyt B | EU552581 |
| 240 | *Micropterus salmoides1* | Largemouth Bass | 100% | COI | MT455395 |
| 059A | *Lepomis gulosus2* | Warmouth | 100% | COI | KX145068 |
| 059B | *Tridentiger bifasciatus* | Shimofuri Goby | 100% | COI, Cyt B, 12S | KF558278, AB021254, AB022898 |
| 059C | *Lepomis gulosus2* | Warmouth | 100% | COI | MT456088 |
| 059D | *Micropterus salmoides* | Largemouth Bass | 100% | COI | MT455786 |
| 107 | *Lepomis macrochirus2* | Bluegill Sunfish | 100% | COI, 12S | HQ339980, KM273836 |
| 044 | *Micropterus salmoides floridanus1* | Florida Largemouth Bass | 100% | COI, Cyt B, 12S | HQ557526, HM070880, MH301070 |
| 123 | *Dorosoma petenense* | Threadfin Shad | 100% | Cyt B | KF013218 |
| 274 | *Dorosoma petenense* | Threadfin Shad | 100% | Cyt B | KF013218 |
| 108 | *Alosa sapidissima3* | American Shad | 100% | Cyt B, 12S | GU556193, MH377781 |
|  | *Alosa alabamae3* | Alabama Shad | 100% | Cyt B, 12S | EF653230, KM273798 |

*1 Sample has the potential to be a hybrid cross between with another member of the Micropterus genus. Only the maternal genotype is presented.*

*2 Sample has the potential to be a hybrid cross between with another member of the Lepomis genus. Only the maternal genotype is presented.*

*3 Sequenced regions identical (>97% similarity) for A. sapidissima and A. alabamae.*
